# Supplementary material for: Environment-friendly Mn and Cu co-doped CsBr nanocrystals with doping-controlled dual-emission and chrominance
Source: Royal Society of Chemistry journal article supplement (doi:10.1039/d2nj03140j), 2022-01-01
Supplement: d2nj03140j1.pdf [file d2nj03140j1.pdf]

## Supporting Information for New Journal of Chemistry.

### **Environment-friendly Mn and Cu co-doped CsBr nanocrystals with doping-controlled dual-emission and chrominance**

*Jingkun Xu\**, *Hao Jiang*, *Shiming Guo*, *Pengfei Xia*, *Shuhong Xu\**, and *Chunlei Wang*

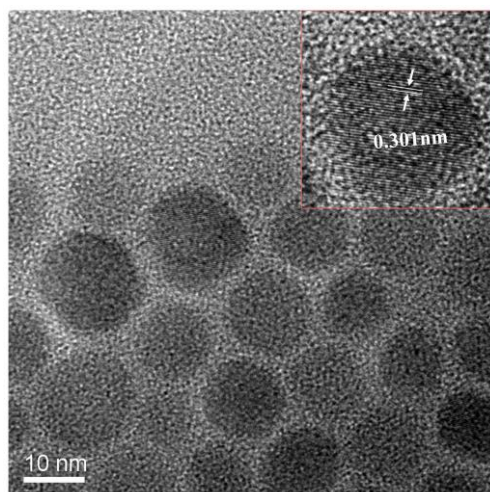

**Fig. S1** TEM image of CsBr NCs. Insets are corresponding HRTEM images.

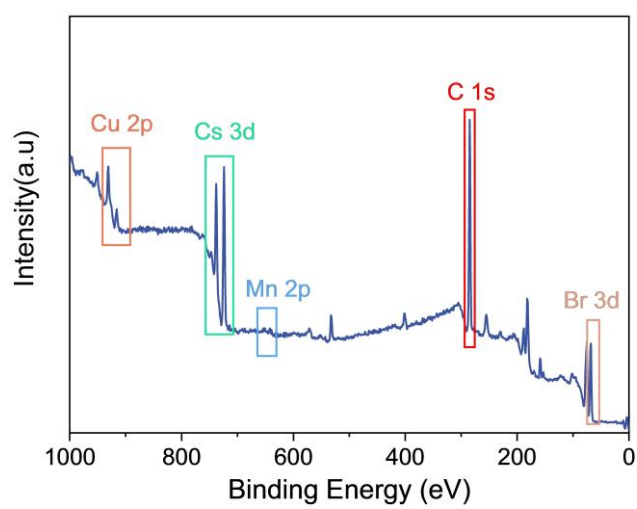

**Fig. S2** XPS spectra of Cu, Mn:CsBr NCs.

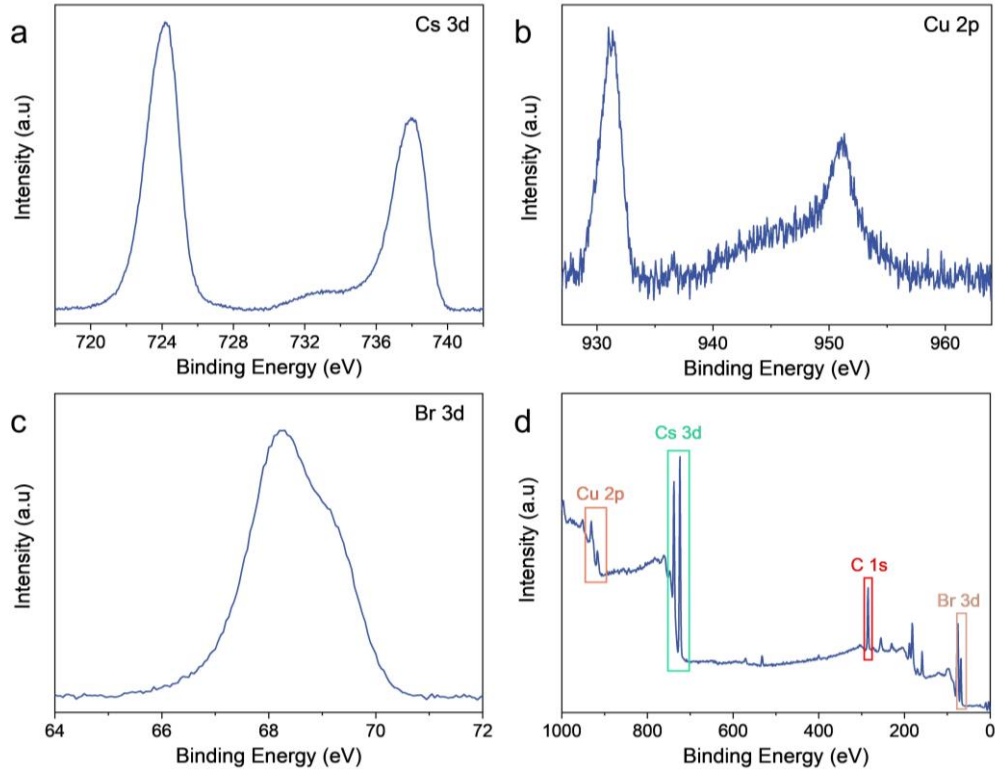

**Fig. S3** High-resolution XPS results for (a) Cs, (b) Cu, (c) Br and (d) XPS spectra of Cu:CsBr NCs.

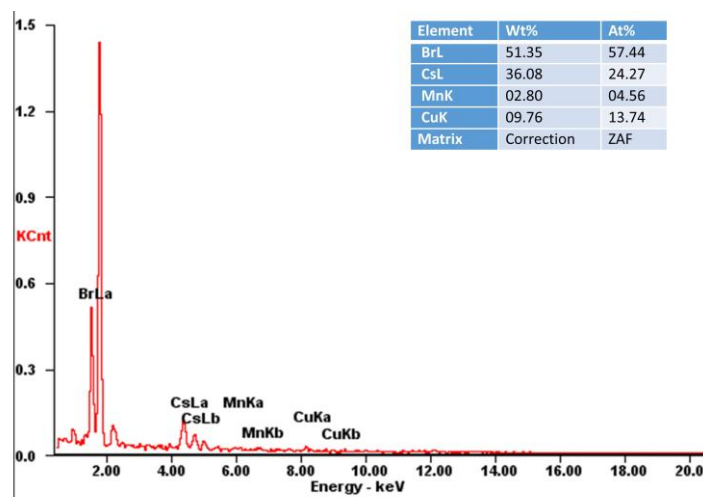

**Fig. S4** EDAX spectra of Cu,Mn:CsBr NCs thin film. Inset is the weight ratio and atomic ratio of elements Br, Cs, Mn and Cu.

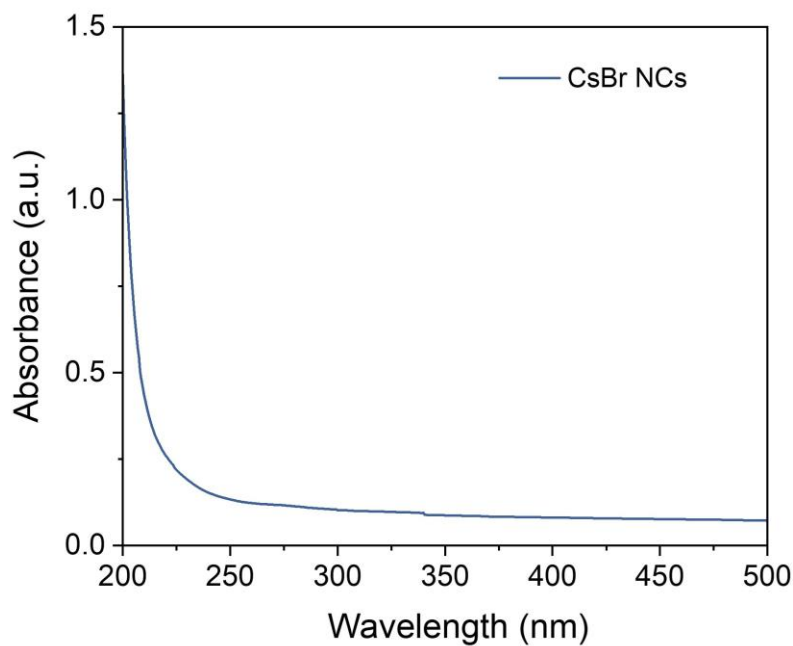

**Fig. S5** The absorption spectra of CsBr NCs.

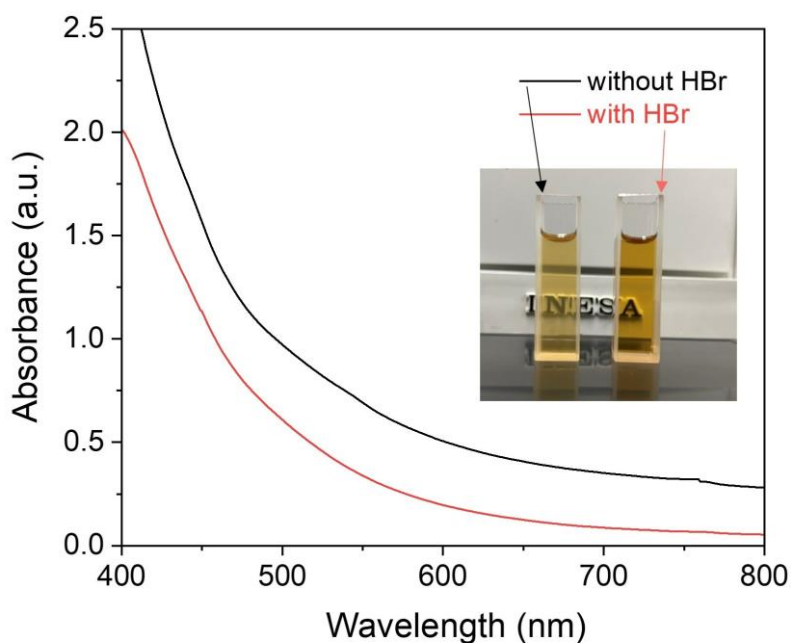

**Fig. S6** The absorption spectra of mixed solution with 100  $\mu\text{L}$  HBr or without HBr. The inset is the photograph of mixed solution. Note: The mixed solution was obtained by the following steps. Oleylamine, oleic acid,  $\text{MnBr}_2$ , and HBr (0 or 100 $\mu\text{L}$ ) were added to octadecene. Subsequently, the flask was transferred to the glove box, the temperature was increased to 150  $^\circ\text{C}$ , and keep at that temperature for 30 min.

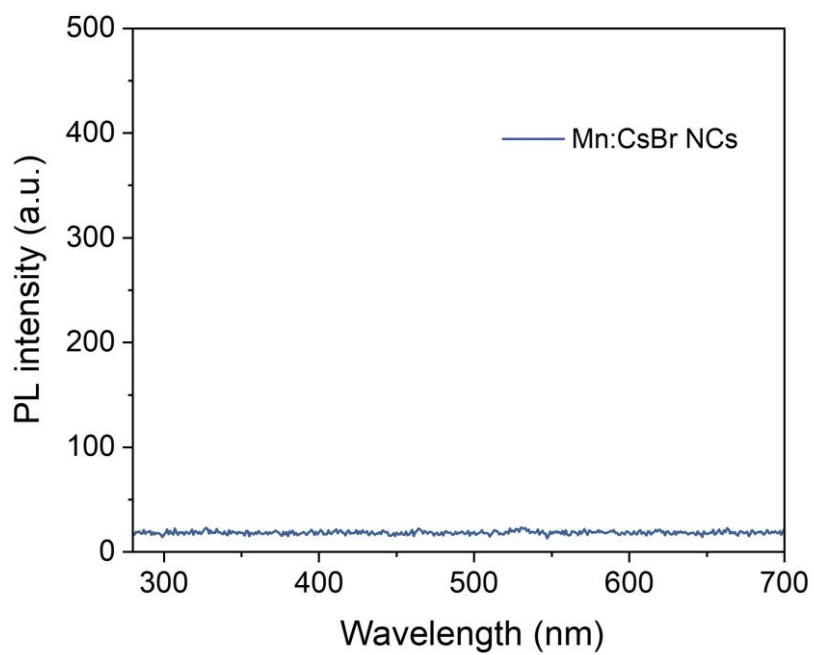

**Fig. S7** The PL spectra of Mn:CsBr NCs. Note: The preparation procedure of Mn:CsBr NCs is the same as that of Cu:CsBr NCs, but employing 100  $\mu\text{L}$  of HBr and replacing  $\text{CuBr}_2$  with  $\text{MnBr}_2$ .
